# Supplementary material for: Polymerization behaviors and polymer branching structures in ATRP of monovinyl and divinyl monomers
Source: Royal Society of Chemistry journal article supplement (doi:10.1039/c3py00338h), 2013-01-01
Supplement: c3py00338h.pdf [file c3py00338h.pdf]

## **Supporting Information**

# Polymerization Behaviors and Polymer Branching Structures in ATRP of Monovinyl and Divinyl Monomers

*Wenyan Huang,<sup>1,2</sup> Hongjun Yang,<sup>2</sup> Xiaoqiang Xue,<sup>2</sup> Bibiao Jiang\*,<sup>2</sup> Jianhai Chen,<sup>2</sup> Yang Yang,<sup>2</sup> Hongting Pu\*,<sup>1</sup> Yun Liu,<sup>2</sup> Dongliang Zhang,<sup>2</sup> Lizhi Kong,<sup>2</sup> and Guangqun Zhai<sup>2</sup>*

<sup>1</sup>Institute of Functional Polymer, School of Materials Science and Engineering, Tongji University, Shanghai 201804, China

<sup>2</sup>School of Materials Science and Engineering, Changzhou University, Changzhou 213164, China

---

\*Corresponding Author, Email: [jiangbibiao@cczu.edu.cn](mailto:jiangbibiao@cczu.edu.cn), Phone: (86)519-8633-0006, Fax: (86)519-8633-0047

\*Corresponding Author, Email: [puhongting@tongji.edu.cn](mailto:puhongting@tongji.edu.cn), Phone/Fax: (86) 21-69580143

Table S1. Optimized Polymerization Conditions

| Branching Agent                | Reactant Ratio (mole)                                                            | $m_{(\text{styrene+BMA})}/m_{\text{anisole}}$ (weight) | Tem. (°C) |
|--------------------------------|----------------------------------------------------------------------------------|--------------------------------------------------------|-----------|
| BMIH <sup>a</sup>              | [ <i>t</i> -BBiB]/[BMIH]/[styrene]/[PMDETA]/[CuBr]=1.0/0.9/30/1.0/1.0            | 2/1                                                    | 80        |
| <i>tri</i> -EGDMA <sup>b</sup> | [ <i>t</i> -BBiB]/[ <i>tri</i> -EGDMA]/[styrene]/[Bpy]/[CuBr]=1.0/0.9/30/2.0/1.0 | 3/1                                                    | 90        |
| DVB <sup>c</sup>               | [ <i>t</i> -BBiB]/[DVB]/[styrene]/[BMA]/[Bpy]/[CuBr]=1.0/0.9/28.2/1.8/2.0/1.0    | 2/1                                                    | 90        |

a: *t*-BBiB<sub>1.0</sub>-BMIH<sub>0.9</sub>-styrene<sub>30</sub>-PMDETA<sub>1.0</sub>-CuBr<sub>1.0</sub>

b: *t*-BBiB<sub>1.0</sub>-*tri*-EGDMA<sub>0.9</sub>-styrene<sub>30</sub>-Bpy<sub>2.0</sub>-CuBr<sub>1.0</sub>

c: *t*-BBiB<sub>1.0</sub>-DVB<sub>0.9</sub>-styrene<sub>28.2</sub>-BMA<sub>1.8</sub>-Bpy<sub>2.0</sub>-CuBr<sub>1.0</sub>

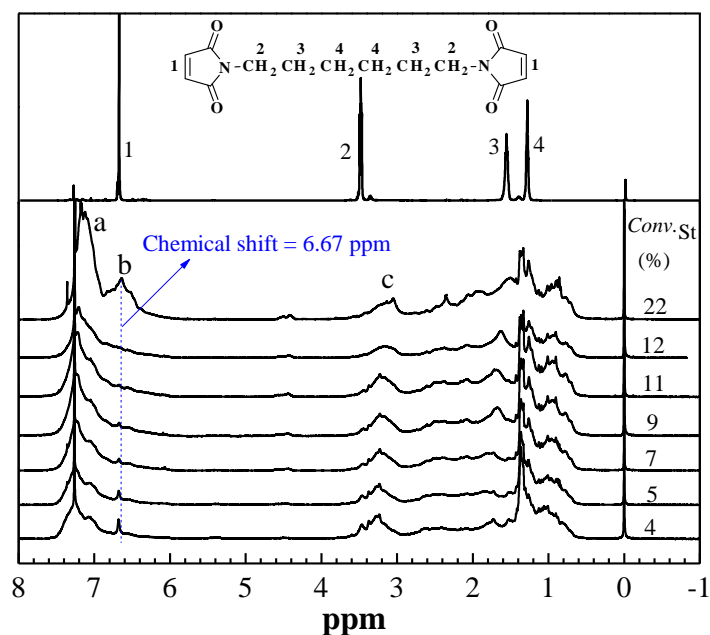

Fig. S1 <sup>1</sup>H-NMR spectra of branching agent BMIH and the copolymers obtained during the copolymerization of styrene and BMIH in anisole at 80 °C: *t*-BBiB<sub>1.0</sub>-BMIH<sub>0.9</sub>-styrene<sub>30</sub>-PMDETA<sub>1.0</sub>-CuBr<sub>1.0</sub>,  $m_{\text{styrene}}/m_{\text{anisole}} = 2/1$ . <sup>1</sup>H-NMR conditions: 25 °C, CDCl<sub>3</sub> as the solvent.

Fig. S1 is  $^1\text{H-NMR}$  spectra of BMIH and the branched polymer prepared using BMIH as the branching agent. The related peaks in Fig. S1 are marked in *a* (benzene ring from styrene monomer unit), *b* (the pendent vinyl group from BMIH), and *c* (the methylene next to nitrogen from BMIH), respectively. The integral values of these three signals are expressed as  $S_a$ ,  $S_b$ , and  $S_c$ . The conversions of BMIH ( $Conv_{\text{BMIH}}$ ) and pendent vinyl group ( $C_P$ ) are calculated using the following equations:

$$Conv_{\text{BMIH}} = \frac{S_c/4}{S_a/5} \times \frac{[\text{St}]_0}{[\text{BMIH}]_0} \times Conv_{\text{St}} = \frac{S_c/4}{S_a/5} \times \frac{30}{0.9} \times Conv_{\text{St}}$$

$$N_{\text{pendent vinylgroupconsumed}} = 0.9 \times Conv_{\text{BMIH}} \times \left( \frac{S_c}{4} - \frac{S_b}{2} \right) / \left( \frac{S_c}{4} \right)$$

$$C_P = N_{\text{pendent vinylgroupconsumed}} / 0.9$$

4, 5 and 2 in the above two equations mean that one BMIH unit has 4 methylene protons next to nitrogen at chemical shift 3.4 ppm, one styrene unit has 5 protons in the benzene ring, and one pendent vinyl group has 2 protons.  $Conv_{\text{St}}$  is the styrene conversion determined using GC.

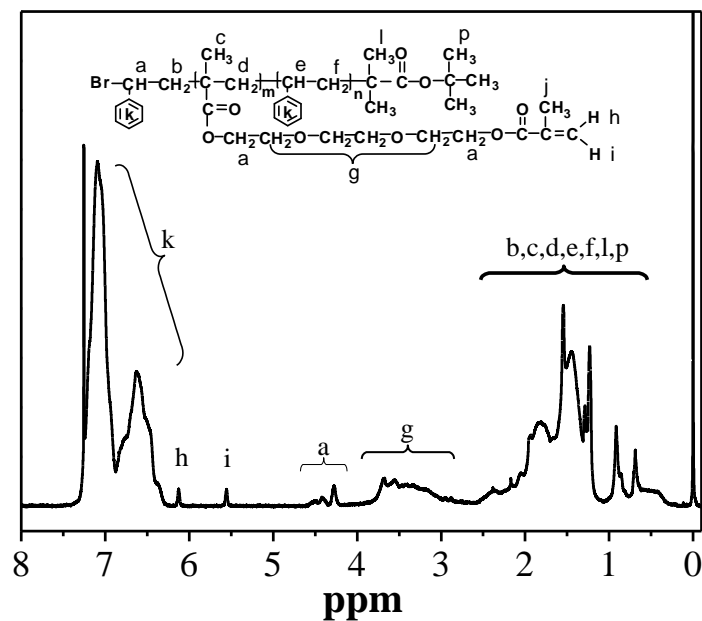

Fig. S2 Typical  $^1\text{H-NMR}$  spectrum of the copolymers obtained during the copolymerization of styrene and *tri*-EGDMA in anisole at 90 °C:  $t\text{-BBiB}_{1.0}\text{-tri-EGDMA}_{0.9}\text{-styrene}_{30}\text{-Bpy}_{2.0}\text{-CuBr}_{1.0}$ ,  $m_{\text{styrene}}/m_{\text{anisole}} = 3/1$ .  $^1\text{H-NMR}$  conditions: 25 °C,  $\text{CDCl}_3$  as the solvent.

Fig. S2 is a typical  $^1\text{H-NMR}$  spectrum of the branched polymer prepared using *tri*-EGDMA as the branching agent. Conversion of the pendent vinyl group ( $C_P$ ) from *tri*-EGDMA was calculated according to the following equation (*Macromolecules* **2009**, *42*, 5976-5982.):

$$C_P = \frac{N_{\text{tri-EGDMA}} - N_P}{N_{\text{tri-EGDMA}}} = 1 - \frac{(S_i + S_h)/2}{S_g/8}$$

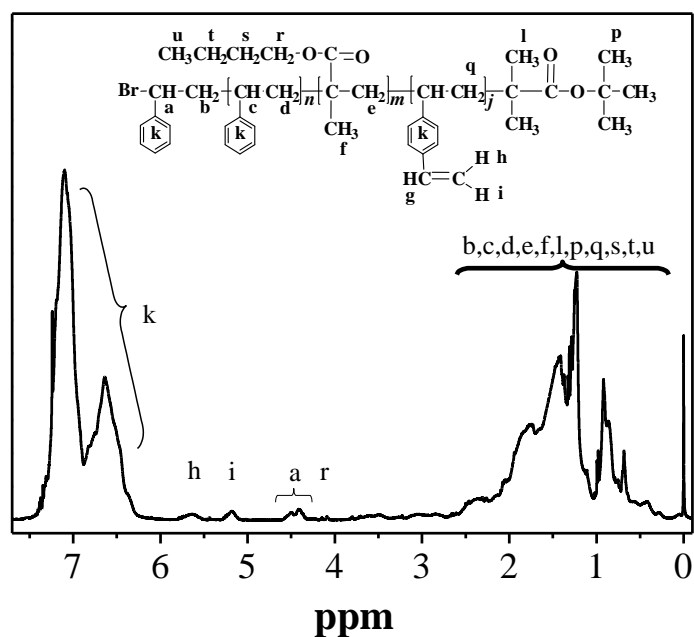

Fig. S3 Typical  $^1\text{H-NMR}$  spectrum of the copolymers obtained during the copolymerization of styrene and BMA with DVB in anisole at  $90\text{ }^\circ\text{C}$ :  $t\text{-BBiB}_{1.0}\text{-DVB}_{0.9}\text{-styrene}_{28.2}\text{-BMA}_{1.8}\text{-Bpy}_{2.0}\text{-CuBr}_{1.0}$ ,  $m_{(\text{styrene+BMA})}/m_{\text{anisole}} = 2/1$ .  $^1\text{H-NMR}$  conditions:  $25\text{ }^\circ\text{C}$ ,  $\text{CDCl}_3$  as the solvent.

Fig. S3 is a typical  $^1\text{H-NMR}$  spectrum of the branched polymer prepared using DVB as the branching agent. The related peaks are marked in  $k$  (chemical shift 6.25-7.5 ppm, phenyl ring from styrene or DVB),  $h$  and  $i$  (chemical shift 5.25 and 5.75 ppm, the pendent vinyl group from DVB). The integral values of these signals are expressed as  $S_k$ ,  $S_h$  and  $S_i$ . It is noted that the signal relating to the third proton of the pendent vinyl group from DVB overlapped with that of the phenyl ring. The conversions of the pendent vinyl group ( $C_p$ ) from DVB were calculated according to the following equations:

$$N_{\text{H-benzenering}} = 5 \times [\text{St}]_0 \times \text{Conv}_{\text{St}} + 4 \times [\text{DVB}]_0 \times \text{Conv}_{\text{DVB}}$$

$$S_{\text{unitproton}} = [S_k - (S_h + S_i)/2] / N_{\text{H-benzenering}}$$

$$N_{\text{pendent vinylgroup assuming no consumption}} = [\text{DVB}]_0 \times \text{Conv.}_{\text{DVB}}$$

$$N_{\text{pendent vinylgroup from NMR}} = [(S_h + S_i)/2] / S_{\text{unitproton}}$$

$$N_{\text{pendent vinylgroup consumed}} = [\text{DVB}]_0 \times \text{Conv.}_{\text{DVB}} - [(S_h + S_i)/2] / S_{\text{unitproton}}$$

$$C_P = N_{\text{pendent vinylgroup consumed}} / 0.9$$

In above equations, 2 means that one pendent vinyl group has 2 protons as marked with *h* and *i*. 5 and 4 mean that the benzene ring of styrene and DVB have 5 and 4 protons, respectively.

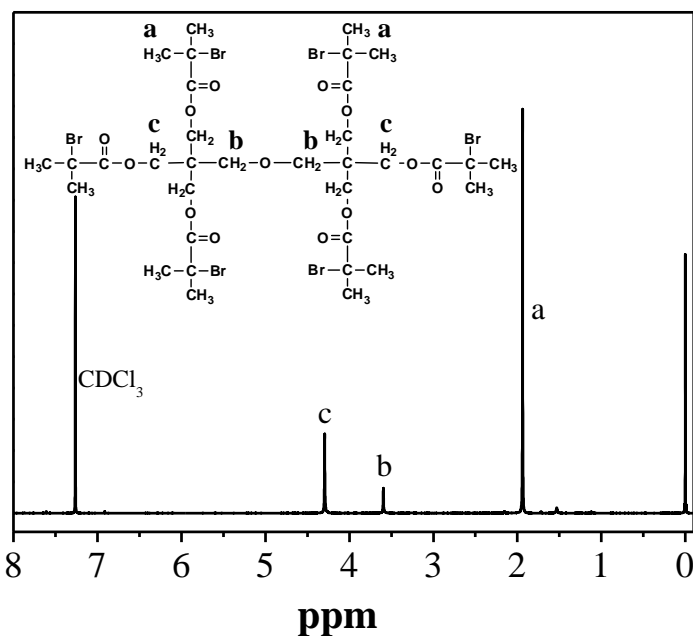

Fig. S4 <sup>1</sup>H-NMR spectrum of dipentaerythritol ester-2-bromoisobutyrate (6BrBu).

<sup>1</sup>H-NMR conditions: 25 °C, CDCl<sub>3</sub> as the solvent.

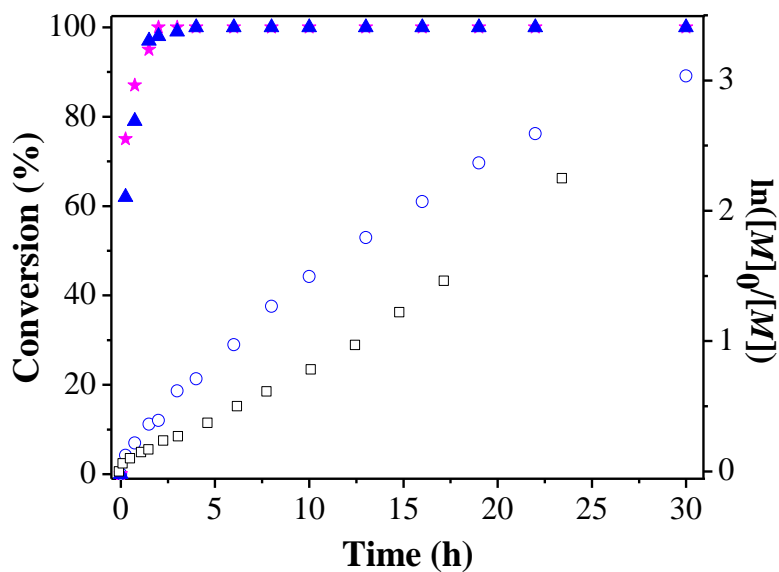

Fig. S5 Kinetics for the copolymerization of styrene and BMIH initiated by *t*-BBiB in anisole at 80 °C. *t*-BBiB<sub>1.0</sub>-BMIH<sub>0.9</sub>-styrene<sub>30</sub>-PMDETA<sub>1.0</sub>-CuBr<sub>1.0</sub>,  $m_{\text{styrene}}/m_{\text{anisole}} = 2/1$ . (★): *t*-BBiB, (▲): BMIH, (○): styrene, (□):  $\ln([M]_0/[M])$ .

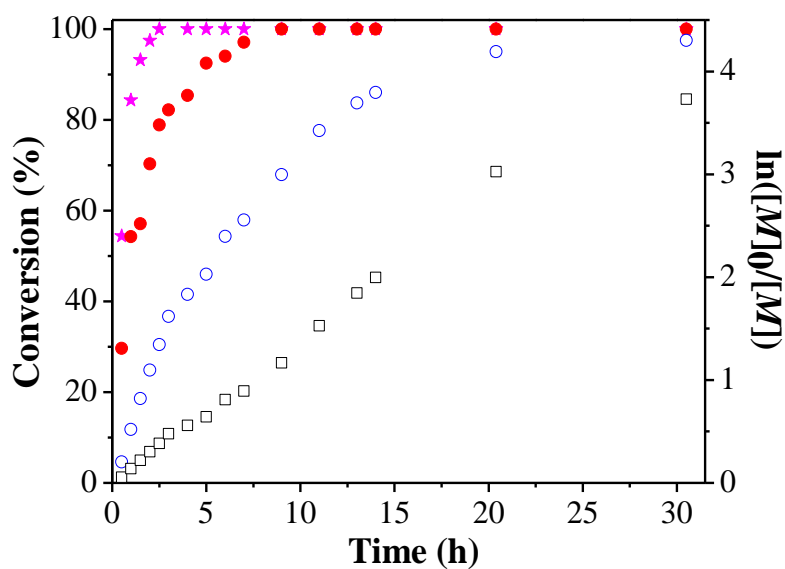

Fig. S6 Kinetics for the copolymerization of styrene and *tri*-EGDMA initiated by *t*-BBiB in anisole at 90 °C. *t*-BBiB<sub>1.0</sub>-*tri*-EGDMA<sub>0.9</sub>-styrene<sub>30</sub>-Bpy<sub>2.0</sub>-CuBr<sub>1.0</sub>,  $m_{\text{styrene}}/m_{\text{anisole}} = 3/1$ . (★): *t*-BBiB, (●): *tri*-EGDMA, (○): styrene, (□):  $\ln([M]_0/[M])$ .

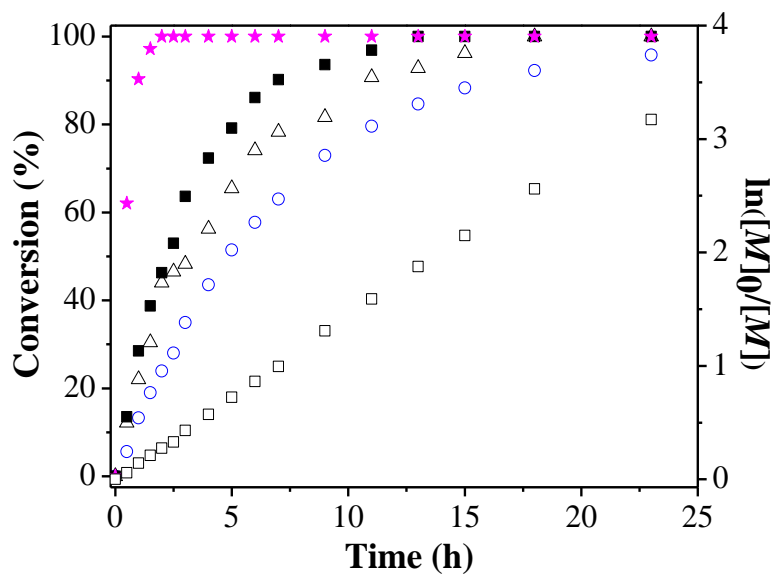

Fig. S7 Kinetics for the copolymerization of styrene and BMA with DVB initiated by *t*-BBiB in anisole at 90 °C. *t*-BBiB<sub>1.0</sub>-DVB<sub>0.9</sub>-styrene<sub>28.2</sub>-BMA<sub>1.8</sub>-Bpy<sub>2.0</sub>-CuBr<sub>1.0</sub>,  $m_{(\text{styrene+BMA})}/m_{\text{anisole}} = 2/1$ . *t*-BBiB: (★), DVB: (■), BMA: (Δ), styrene: (○),  $\ln([M]_0/[M])$ : (□)

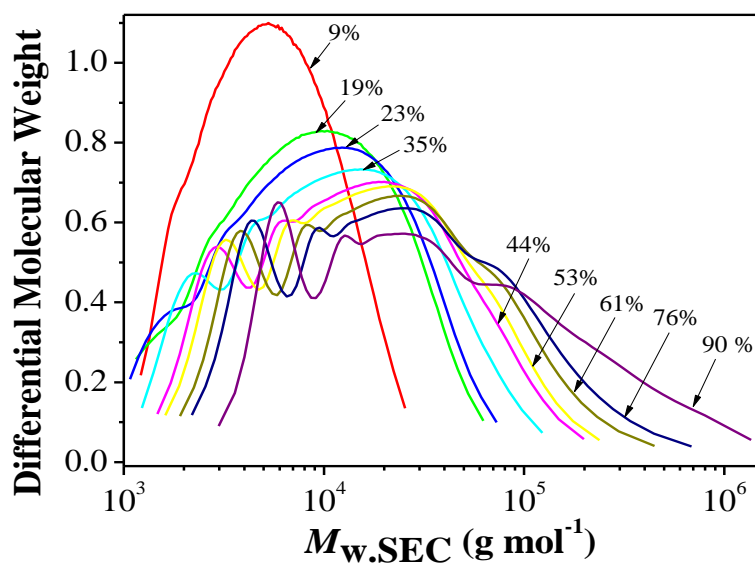

Fig. S8 Evolution of the differential molecular weight distribution with conversion for



the copolymerization of styrene and BMIH initiated by *t*-BBIb in anisole at 80 °C.

*t*-BBIb<sub>1.0</sub>-BMIH<sub>0.9</sub>-styrene<sub>30</sub>-PMDETA<sub>1.0</sub>-CuBr<sub>1.0</sub>,  $m_{\text{styrene}}/m_{\text{anisole}} = 2/1$ .

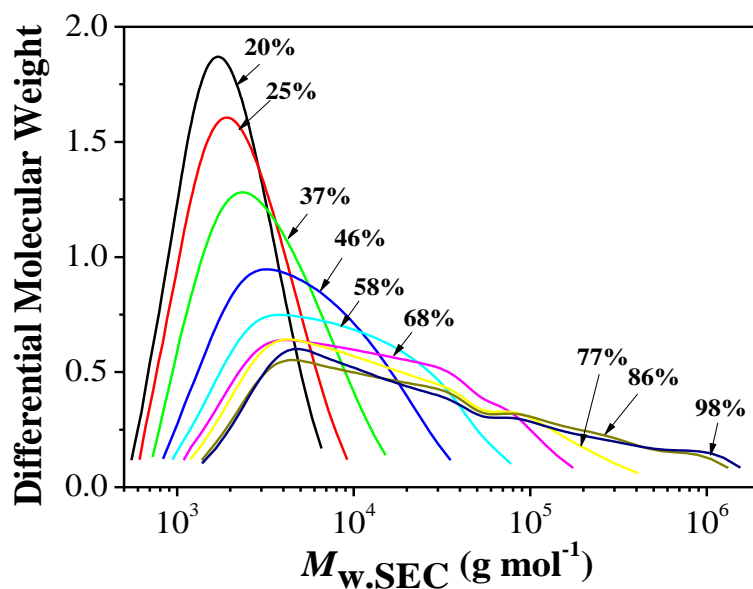

Fig. S9 Evolution of the differential molecular weight distribution with conversion for the copolymerization of styrene and *tri*-EGDMA initiated by *t*-BBIb in anisole at 90

°C. *t*-BBIb<sub>1.0</sub>-*tri*-EGDMA<sub>0.9</sub>-styrene<sub>30</sub>-Bpy<sub>2.0</sub>-CuBr<sub>1.0</sub>,  $m_{\text{styrene}}/m_{\text{anisole}} = 3/1$ .

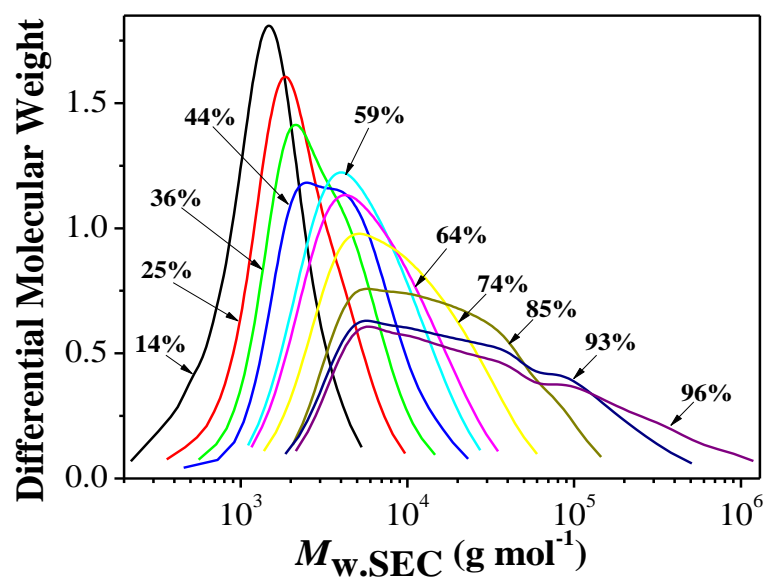

Fig. S10 Evolution of the differential molecular weight distribution with conversion for the copolymerization of styrene and BMA with DVB initiated by *t*-BBiB in anisole at 90 °C.  $\text{DVB}_{1.0}\text{-tri-EGDMA}_{0.9}\text{-styrene}_{28.2}\text{-BMA}_{1.8}\text{-Bpy}_{2.0}\text{-CuBr}_{1.0}$ ,  $m_{(\text{styrene+BMA})}/m_{\text{anisole}} = 2/1$ .

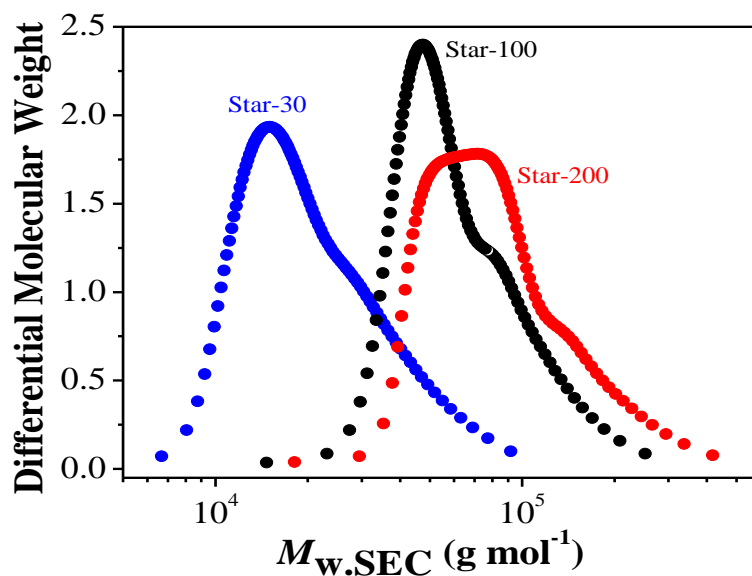

Fig. S11 Differential molecular weight distribution of the modal star polystyrene.

$6\text{BrBu}_{1.0}\text{-styrene}_x\text{-Bpy}_{12}\text{-CuBr}_{6.0}$ ,  $m_{\text{styrene}}/m_{\text{anisole}} = 2/1$ , 90 °C,  $x = 180, 600$  and  $1200$  for Star-30, Star-100, and Star-200, 30, 100 and 200 represent the arm length at 100% styrene conversion, respectively.

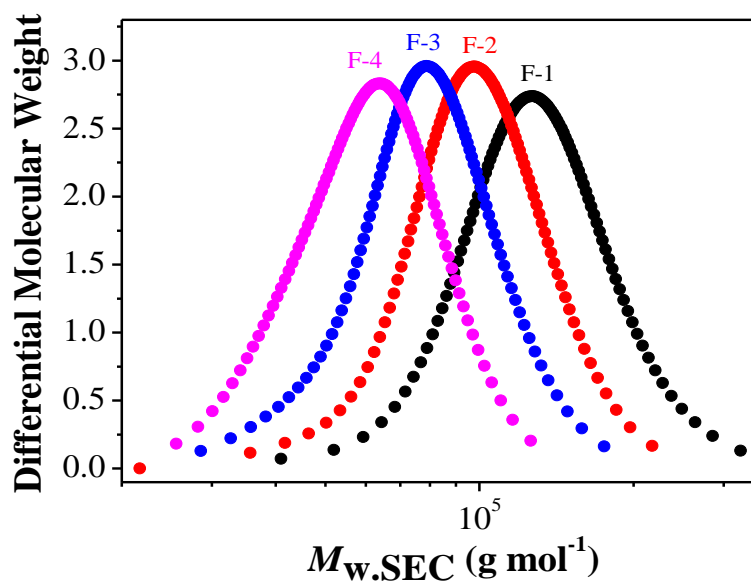

Fig. S12 Differential molecular weight distribution of the fractionations at 98 % monomer conversion.

$t$ -BBiB<sub>1.0</sub>-*tri*-EGDMA<sub>0.9</sub>-styrene<sub>30</sub>-Bpy<sub>2.0</sub>-CuBr<sub>1.0</sub>,  $m_{styrene}/m_{anisole} = 3/1$ , 90 °C.

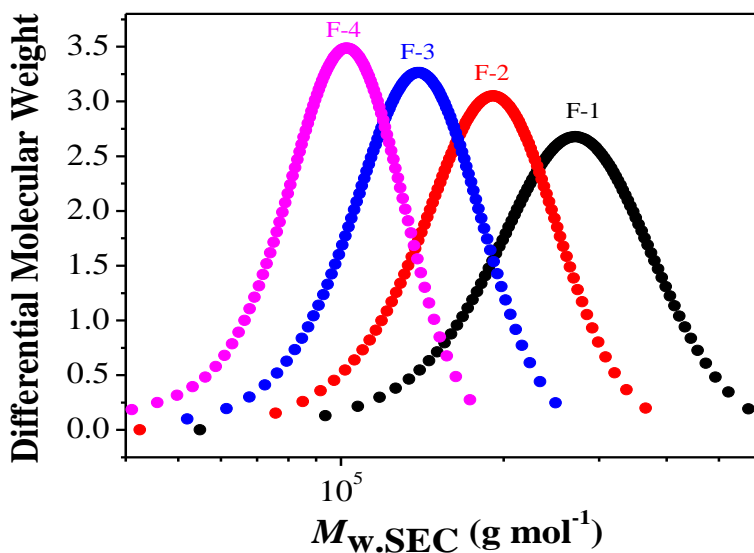

Fig. S13 Differential molecular weight distribution of the fractionations at 96 % monomer conversion.  $t$ -BBiB<sub>1.0</sub>-DVB<sub>0.9</sub>-styrene<sub>28.2</sub>-BMA<sub>1.8</sub>-Bpy<sub>2.0</sub>-CuBr<sub>1.0</sub>,

$m_{(styrene+BMA)}/m_{anisole} = 2/1$ , 90 °C.

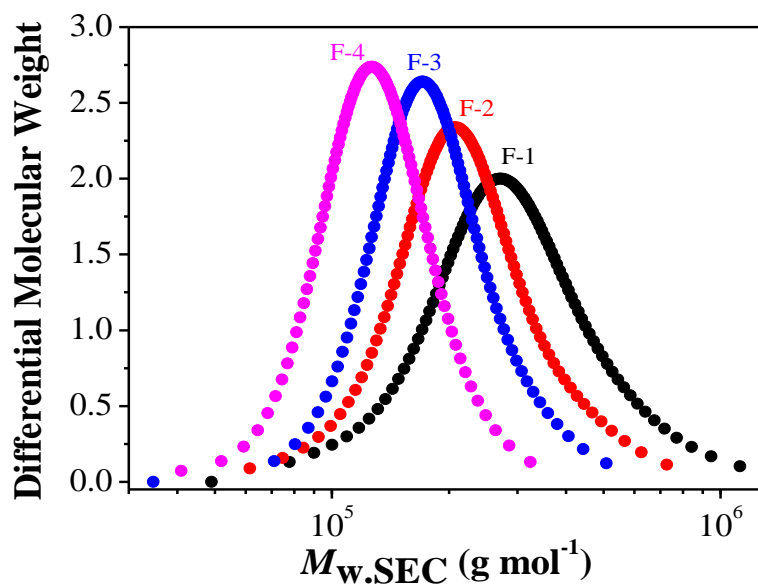

Fig. S14 Differential molecular weight distribution of the fractionations at 53 % monomer conversion.

$t$ -BBiB<sub>1.0</sub>-BMIH<sub>0.9</sub>-styrene<sub>30</sub>-PMDETA<sub>1.0</sub>-CuBr<sub>1.0</sub>,  $m_{styrene}/m_{anisole} = 2/1$ , 80 °C.

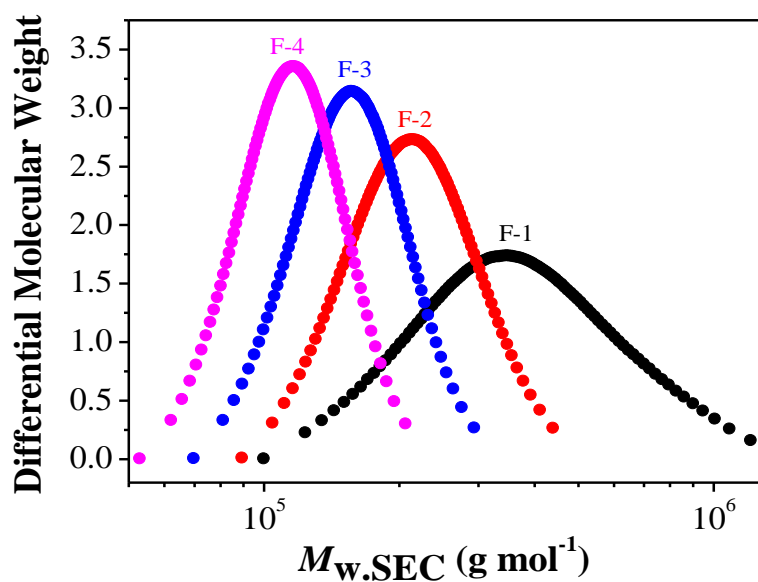

Fig. S15 Differential molecular weight distribution of the fractionations at 90 % monomer conversion.

$t$ -BBiB<sub>1.0</sub>-BMIH<sub>0.9</sub>-styrene<sub>30</sub>-PMDETA<sub>1.0</sub>-CuBr<sub>1.0</sub>,  $m_{styrene}/m_{anisole} = 2/1$ , 80 °C.
